# Supplementary material for: Identifying CD1c as a potential biomarker by the comprehensive exploration of tumor mutational burden and immune infiltration in diffuse large B cell lymphoma
Source: PeerJ journal article supplement (doi:10.7717/peerj.16618), 2023-12-11

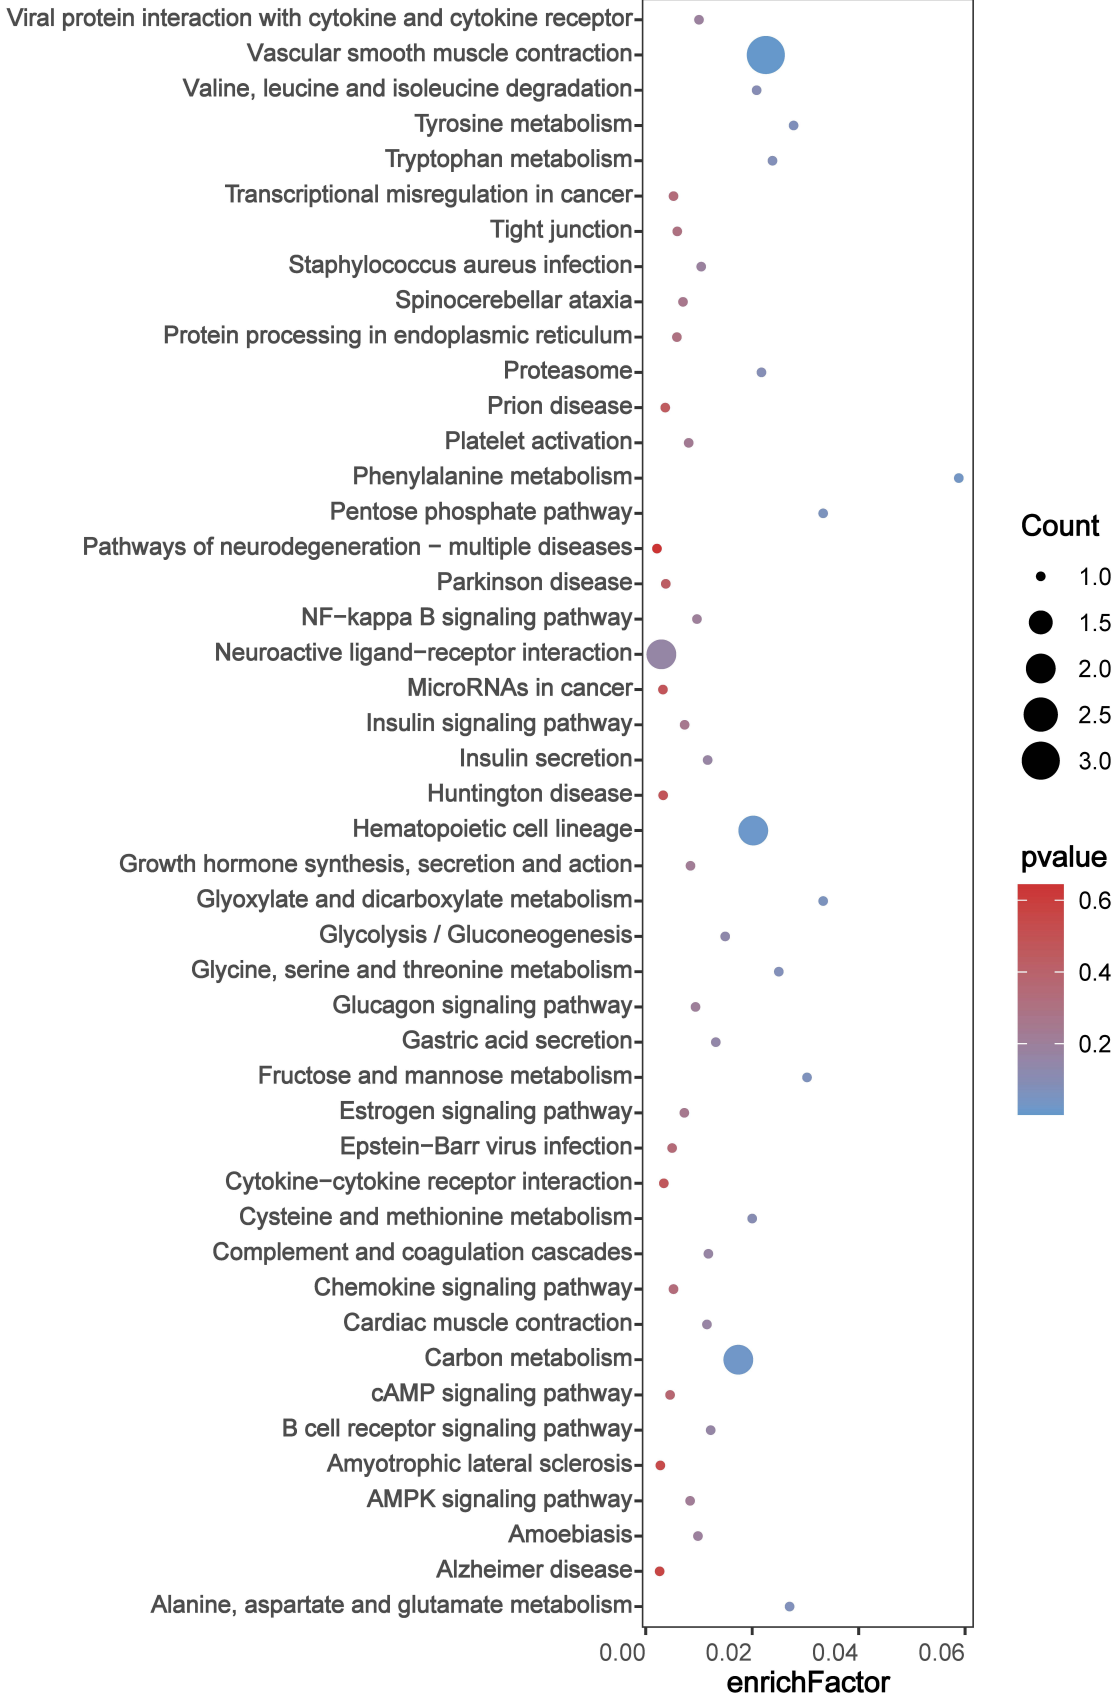

Supplement: Supplementary_Figure_2.pdf [file Supplementary_Figure_2.pdf]
